# Supplementary material
Source: PubMed Central journal article supplement (PMC3307224)
Supplement: NIHMS359895-supplement-Suppl_Fig2.pdf [file NIHMS359895-supplement-Suppl_Fig2.pdf]

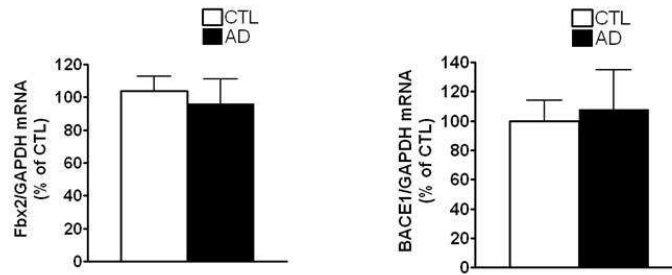

**Fig. 2 mRNA levels of BACE1 in brains from human AD patients were analyzed by qRT-PCR.** Quantitative RT-PCR analysis showed no difference in the expression levels of Fbx2 (a) and BACE1 (b) mRNA purified from the post-mortem brains from AD patients (parahippocampal gyrus; BA 36) and control cases. Data were normalized against GAPDH (n = 8 for both genotypes,  $p > 0.05$ ).

254x190mm (96 x 96 DPI)

Review
