# Supplementary material
Source: PubMed Central journal article supplement (PMC3307224)
Supplement: NIHMS359895-supplement-Suppl_Fig3.pdf [file NIHMS359895-supplement-Suppl_Fig3.pdf]

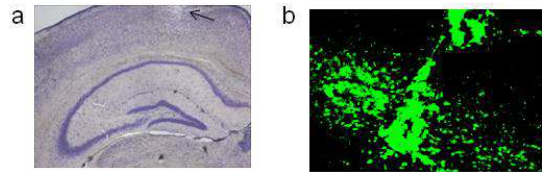

**Fig. 3** Stereotactic delivery of adenoviral -Fbx2 to mouse brain. (a) Representative unstained bright-field image showing the needle track (arrows) after injection of Adenoviral vector. (b) Adenoviral-GFP-Fbx2, which co-expresses a reporter GFP, was stereotactically injected into CA1 region of adult mouse hippocampus. After four weeks, Fbx2 expression was visualized by fluorescence microscope

254x190mm (96 x 96 DPI)

Review
