# Supplementary material
Source: PubMed Central journal article supplement (PMC3307224)
Supplement: NIHMS359895-supplement-Supplementary_Fig1.pdf [file NIHMS359895-supplement-Supplementary_Fig1.pdf]

## Supplementary data:

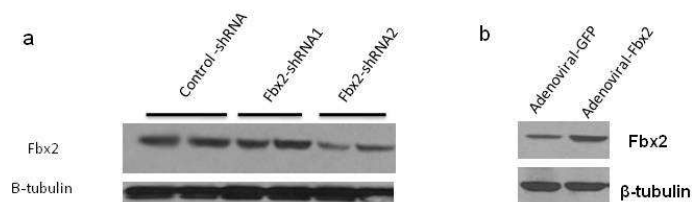

**Fig. 1 Characterization of retroviral-Fbx2-shRNA and adenoviral-Fbx2.**

(a) Retroviral-Fbx2-shRNA silencing endogenous Fbx2 in primary neuron cultures. Hippocampal neurons from C57BL/6J mice (E16) at 11 DIV were infected with retroviral-GFP, or retroviral-Fbx2shRNA. 72 hours after infection, cell lysate were collected and Western blotting showed the significantly decreased Fbx2 levels in the #2 Fbx2-shRNA infected cells. (b) The Fbx2 levels were increased by the infection of adenoviral-Fbx2 compared with adenoviral-GFP infected cells probed by Western blot

254x190mm (96 x 96 DPI)
